# Supplementary material for: Valorization of Apple Peels through the Study of the Effects on the Amyloid Aggregation Process of κ-Casein
Source: MDPI journal article supplement (doi:10.3390/molecules26082371), 2021-04-19
Supplement: s1 [file s1]

# Supplementary Materials: Valorization of apple peels through the study of the effect on the amyloid aggregation process of $\kappa$ -casein

Valeria Guarrasi, Giacomina Cinzia Rappa, Maria Assunta Costa, Fabio Librizzi, Marco Raimondo, Vita Di Stefano, Maria Antonietta Germanà, Silvia Vilasi

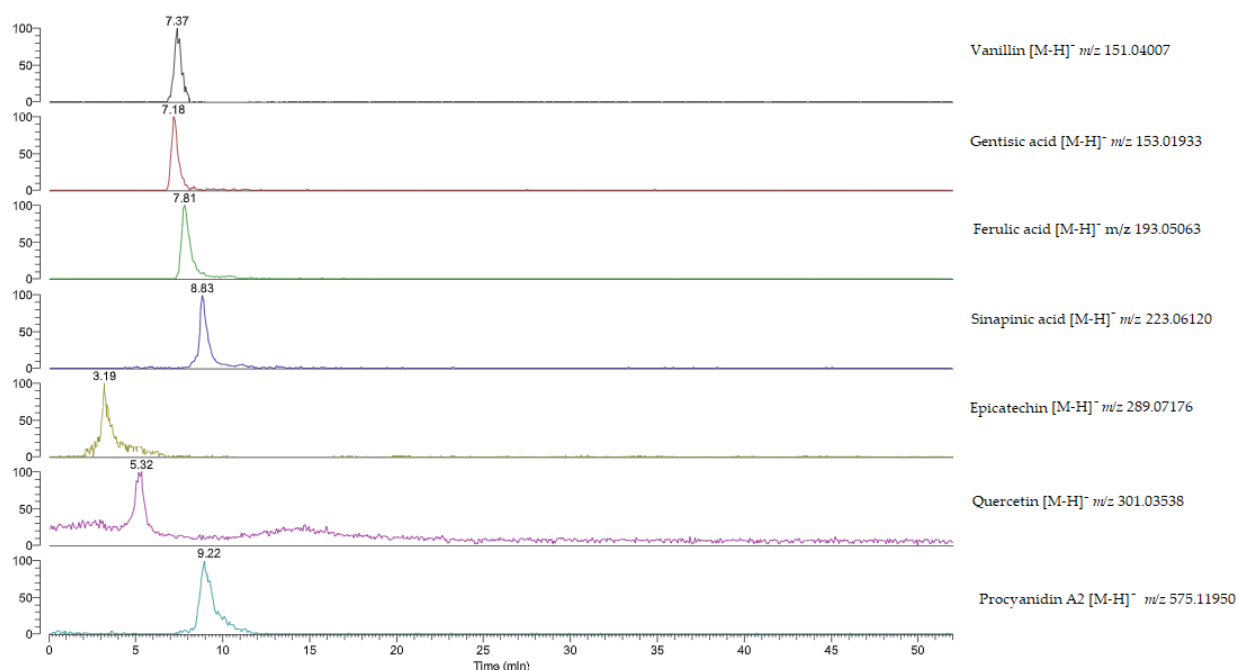

**Figure S1:** UHPLC–HESI-MS targeted single ion monitoring chromatogram obtained from Fuji apple peel phenolic extract.

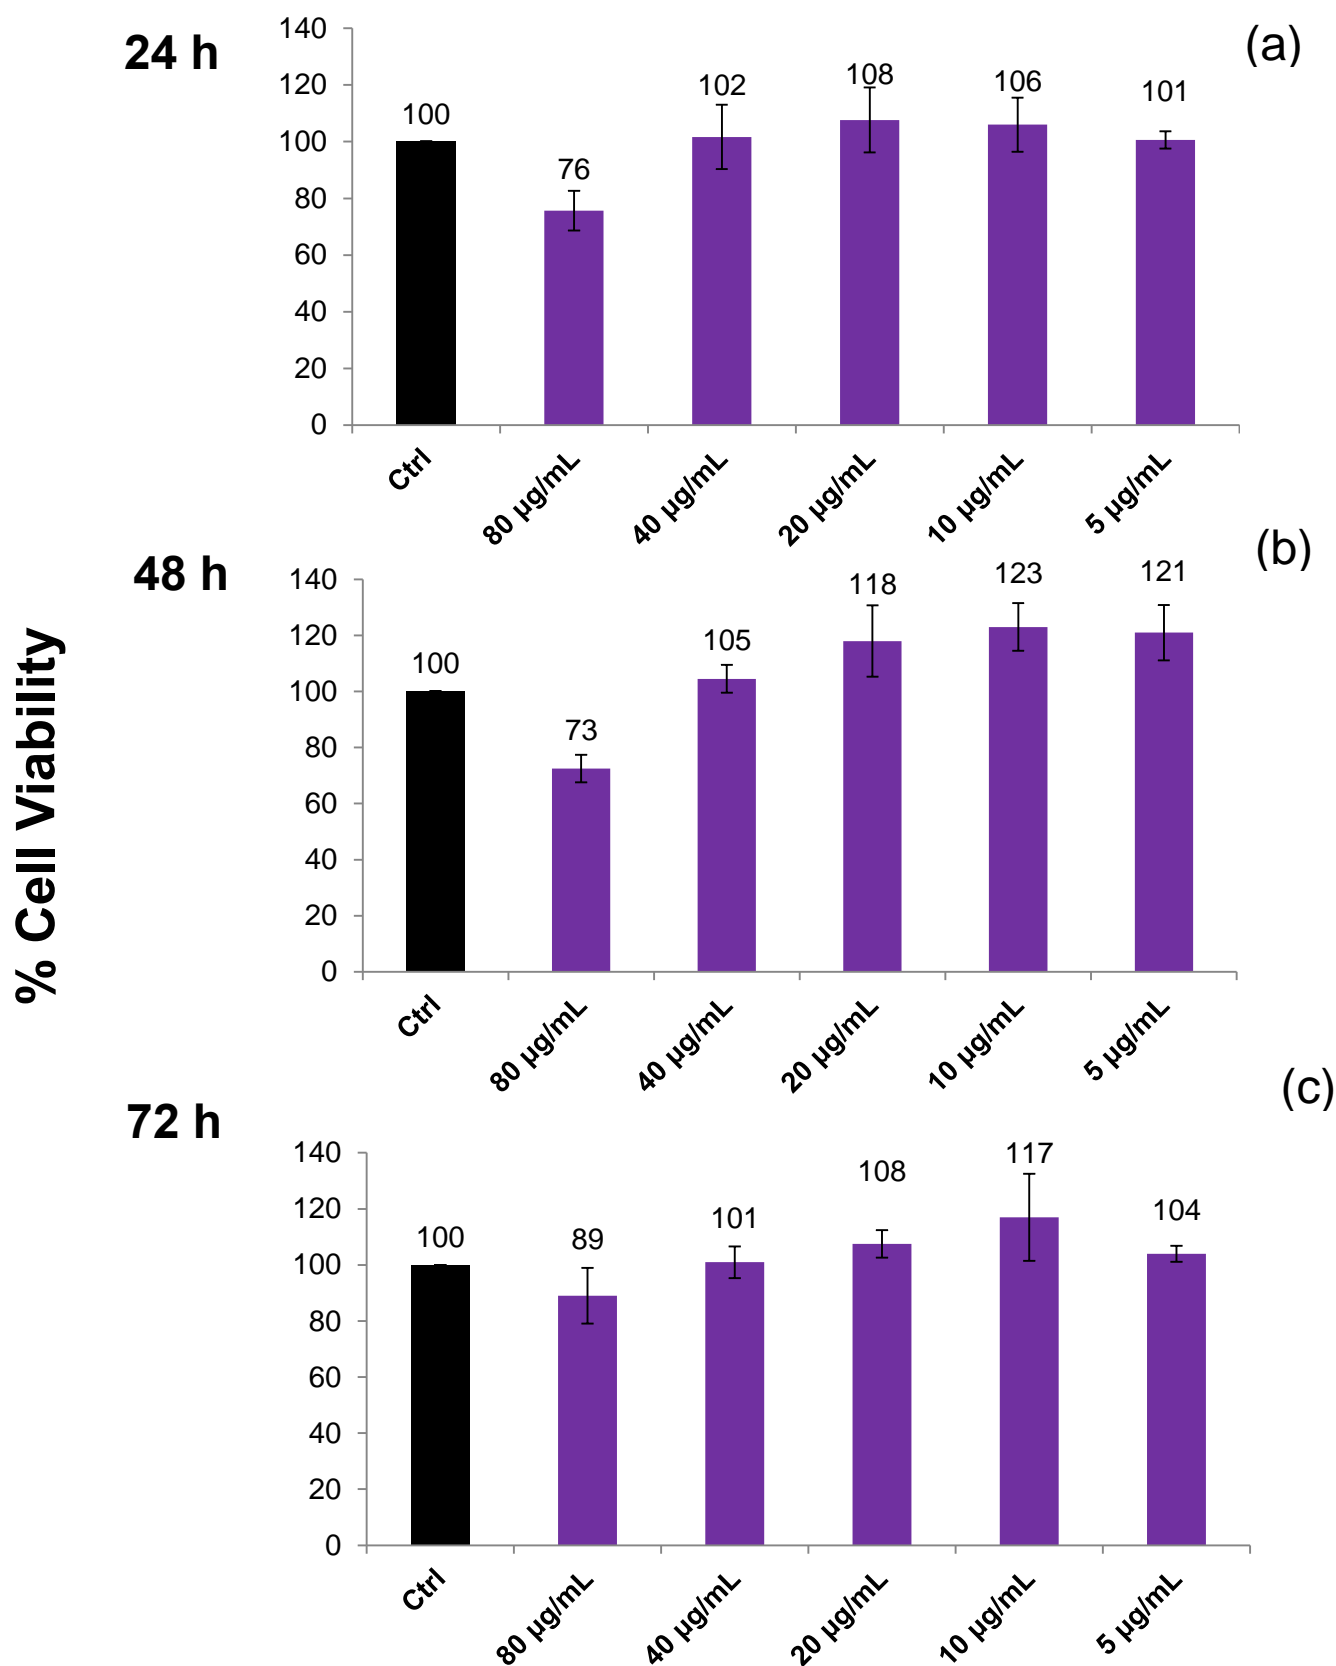

**Figure S2:** Effects of Fuji apple peel phenolic extract on NIH-3T3 cell viability. The cells were incubated for 24 h (a), 48 h (b), and 72 h (c) with the appropriate concentrations of phenolic extracts. At the end of incubation, cell viability was measured by MTS assay as described in Materials and Methods. Values are means  $\pm$  SD of cell viability calculated from at least three separate experiments.

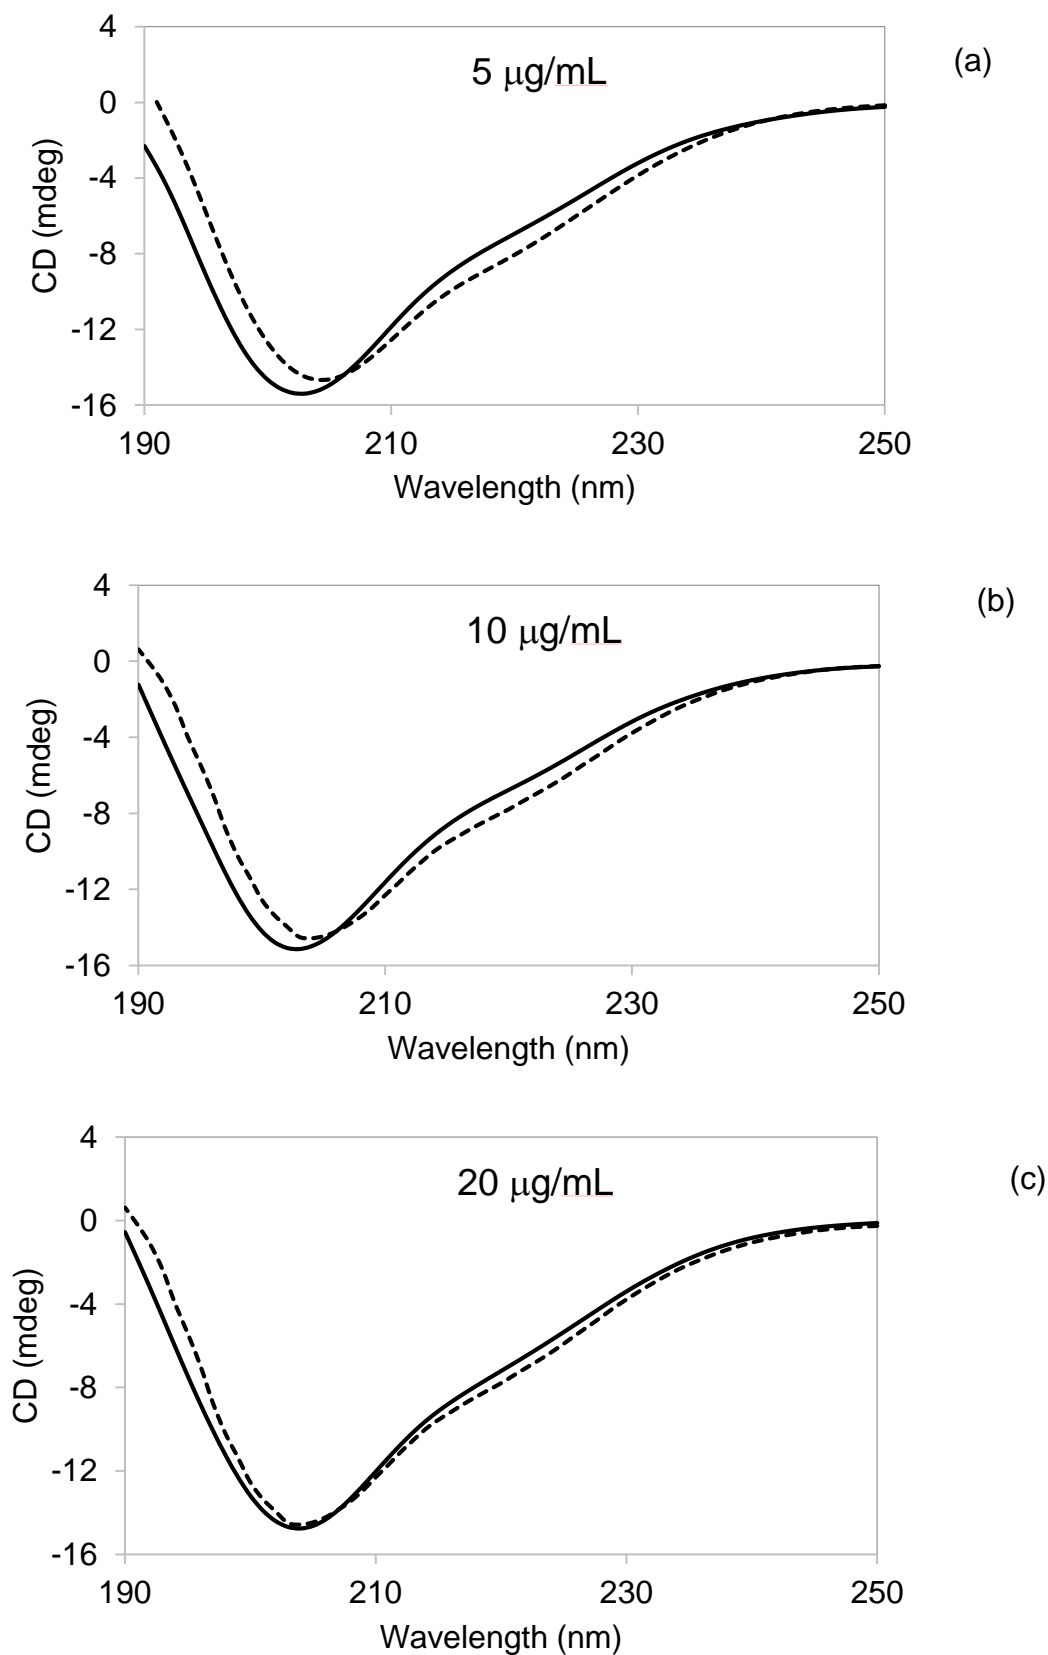

**Figure S3:** CD spectra of 50  $\mu\text{M}$   $\kappa$ -casein at the beginning of the amyloid aggregation process (black) and after 24 hours of incubation at 37  $^{\circ}\text{C}$  (dashed black) in the presence of 5  $\mu\text{g/mL}$  of APP (a); 10  $\mu\text{g/mL}$  of APP (b); 20  $\mu\text{g/mL}$  of APP (c).
